# Supplementary material for: Identifying Environmental Determinants Relevant to Health and Wellbeing in Remote Australian Indigenous Communities: A Scoping Review of Grey Literature
Source: MDPI journal article supplement (doi:10.3390/ijerph18084167), 2021-04-15
Supplement: s1 [file s1]

## Supplementary File

### Title: Identifying environmental determinants relevant to health and wellbeing in remote Australian Indigenous communities: a scoping review of grey literature

Authors: Chakraborty, A.; Daniel, M.; Howard, NJ.; Chong, A.; Slavin, N.; Brown, A.; and Cargo, M.

**Table S1:** Built and Socio-political environmental indicator classification framework.

| Indicator ID | Indicator Group                  | Goal Dimension                                  | Domain                       | Subject Group |
|--------------|----------------------------------|-------------------------------------------------|------------------------------|---------------|
| 4            | Agricultural                     | Community business and economic development     | Community economic resources | Built         |
| 9            | Commercial accommodation         | Commercial accommodation available              | Housing                      | Built         |
| 10           | Commercial retail facilities     | Community business and economic development     | Community economic resources | Built         |
| 11           | Community and cultural centres   | Community infrastructure and social programming | Community infrastructure     | Built         |
| 12           | Community dwelling               | Residential space available                     | Housing                      | Built         |
| 19           | Community service facilities     | Community infrastructure and social programming | Community infrastructure     | Built         |
| 20           | Education and training centres   | Community infrastructure and social programming | Education                    | Built         |
| 31           | Food retail facilities           | Community business and economic development     | Community economic resources | Built         |
| 32           | General community infrastructure | Community infrastructure and social programming | Community infrastructure     | Built         |
| 33           | Health service facilities        | Community infrastructure and social programming | Health                       | Built         |

| Indicator ID | Indicator Group                           | Goal Dimension                                   | Domain                        | Subject Group |
|--------------|-------------------------------------------|--------------------------------------------------|-------------------------------|---------------|
| 37           | Incomplete building                       | Residential space available                      | Housing                       | Built         |
| 39           | Industrial                                | Community business and economic development      | Community economic resources  | Built         |
| 43           | Land use and green space management       | Land and natural resources                       | Community infrastructure      | Built         |
| 49           | Mining extraction                         | Community business and economic development      | Community economic resources  | Built         |
| 54           | Power supply                              | Community infrastructure and social programming  | Community infrastructure      | Built         |
| 62           | Residential dwelling                      | Residential space available                      | Housing                       | Built         |
| 71           | Solid waste disposal                      | Community infrastructure and social programming  | Community infrastructure      | Built         |
| 72           | Sports and recreational facilities        | Community infrastructure and social programming  | Community infrastructure      | Built         |
| 78           | Water supply                              | Community infrastructure and social programming  | Community infrastructure      | Built         |
| 2            | Access to working place                   | Capacities provided by the transportation system | Transportation                | Built         |
| 3            | Advanced communication facility           | Media infrastructure                             | Leisure and Media Consumption | Built         |
| 7            | Basic print and electronic media facility | Media infrastructure                             | Leisure and Media Consumption | Built         |
| 8            | Basic telecommunication facility          | Media infrastructure                             | Leisure and Media Consumption | Built         |
| 25           | Environmentally damaging activities       | Environmentally damaging activities              | Community infrastructure      | Built         |
| 51           | Negative social impact                    | Negative impact of the transportation system     | Transportation                | Built         |
| 57           | Protecting environment quality            | Protecting environment quality                   | Community infrastructure      | Built         |
| 58           | Provision of environmental goods          | Provision of environmental goods                 | Community infrastructure      | Built         |
| 60           | Quality of housing unit amenities         | Quality of housing unit amenities                | Housing                       | Built         |
| 64           | Road network                              | Capacities provided by the transportation system | Transportation                | Built         |

| Indicator ID | Indicator Group                                        | Goal Dimension                                   | Domain                                   | Subject Group   |
|--------------|--------------------------------------------------------|--------------------------------------------------|------------------------------------------|-----------------|
| 75           | Transport facilities                                   | Capacities provided by the transportation system | Transportation                           | Built           |
| 76           | Travel purposes                                        | Capacities provided by the transportation system | Transportation                           | Built           |
| 77           | Volume of traffic                                      | Capacities provided by the transportation system | Transportation                           | Built           |
| 5            | Assimilation policies                                  | Assimilation policies                            | Background and History                   | Socio-political |
| 6            | Awards, monuments and holidays                         | General societal visibility and recognition      | Indigenous Visibility and Representation | Socio-political |
| 14           | Community governance                                   | Governing structures, bodies and processes       | Community Capacity                       | Socio-political |
| 15           | Community infrastructure and social services           | Community infrastructure and social services     | Indigenous Self-Government and Autonomy  | Socio-political |
| 16           | Community members training                             | Skills development                               | Community Capacity                       | Socio-political |
| 17           | Community planning                                     | Governing structures, bodies and processes       | Community Capacity                       | Socio-political |
| 18           | Community protection resources                         | Protection from violence, crime and abuse        | Public Safety and Crime                  | Socio-political |
| 21           | Emergency preparedness policies                        | Emergency preparedness                           | Public Safety and Crime                  | Socio-political |
| 22           | Emergency preparedness resources                       | Emergency preparedness                           | Public Safety and Crime                  | Socio-political |
| 23           | Employment security and reemployment opportunities     | Labour market opportunities and risks            | Labour Market and Working Conditions     | Socio-political |
| 24           | Environmental health policies                          | Health-related legislation                       | Public Safety and Crime                  | Socio-political |
| 26           | External recognition of homelands or traditional lands | Reconciliation mechanisms or events              | Background and History                   | Socio-political |
| 27           | Extra-civic engagement                                 | Participation                                    | Community Capacity                       | Socio-political |
| 29           | Family separation                                      | Family separation                                | Background and History                   | Socio-political |

| <b>Indicator ID</b> | <b>Indicator Group</b>                        | <b>Goal Dimension</b>                         | <b>Domain</b>                            | <b>Subject Group</b> |
|---------------------|-----------------------------------------------|-----------------------------------------------|------------------------------------------|----------------------|
| 30                  | Fiscal policies and regulatory activities     | Fiscal policies and regulatory activities     | Indigenous Self-Government and Autonomy  | Socio-political      |
| 34                  | Historical events                             | Historical events                             | Background and History                   | Socio-political      |
| 35                  | Human development                             | Human development                             | Social Welfare                           | Socio-political      |
| 36                  | Icons and nomenclature                        | General societal visibility and recognition   | Indigenous Visibility and Representation | Socio-political      |
| 40                  | Intra-civic engagement                        | Participation                                 | Community Capacity                       | Socio-political      |
| 42                  | Land and natural resources                    | Land and natural resources                    | Community Economic Resources             | Socio-political      |
| 44                  | Language policies                             | Language policies                             | Language and literacy                    | Socio-political      |
| 45                  | Leadership training                           | Skills development                            | Community Capacity                       | Socio-political      |
| 46                  | Legal protection                              | Protection from violence, crime and abuse     | Public Safety and Crime                  | Socio-political      |
| 47                  | Local community organisations                 | Community resources                           | Community Capacity                       | Socio-political      |
| 50                  | National and regional governing bodies        | Governing structures, bodies and processes    | Community Capacity                       | Socio-political      |
| 52                  | Participation in the political context        | Participation                                 | Community Capacity                       | Socio-political      |
| 53                  | Policy making boards and bodies               | Governing structures, bodies and processes    | Community Capacity                       | Socio-political      |
| 55                  | Program and organisation funding              | Community resources                           | Community Capacity                       | Socio-political      |
| 56                  | Programs for Indigenous community development | Programs for Indigenous community development | Indigenous Visibility and Representation | Socio-political      |
| 59                  | Public health-related policy                  | Health-related legislation                    | Public Safety and Crime                  | Socio-political      |
| 61                  | Recognition of other losses                   | Reconciliation mechanisms or events           | Background and History                   | Socio-political      |
| 63                  | Return or recognition of removed artefacts    | Reconciliation mechanisms or events           | Background and History                   | Socio-political      |
| 65                  | Services and professions                      | Services and professions                      | Indigenous Visibility and Representation | Socio-political      |
| 66                  | Settled claims                                | Settled claims                                | Community Economic Resources             | Socio-political      |

| <b>Indicator ID</b> | <b>Indicator Group</b>                  | <b>Goal Dimension</b>                      | <b>Domain</b>                        | <b>Subject Group</b> |
|---------------------|-----------------------------------------|--------------------------------------------|--------------------------------------|----------------------|
| 67                  | Social and inter-organisational network | Governing structures, bodies and processes | Community Capacity                   | Socio-political      |
| 68                  | Social assistance for the unemployed    | Labour market opportunities and risks      | Labour Market and Working Conditions | Socio-political      |
| 69                  | Social dependence                       | Social dependence                          | Social Welfare                       | Socio-political      |
| 70                  | Social expenditures                     | Expenditure for the transportation system  | Transportation                       | Socio-political      |
| 73                  | State affiliation and identification    | State affiliation and identification       | Background and History               | Socio-political      |
| 79                  | Workforce training                      | Skills development                         | Community Capacity                   | Socio-political      |
